# Supplementary material for: The human brain-inspired light-stimulated gelatin-biopolymer gated synaptic transistor for realizing cognitive activities
Source: Royal Society of Chemistry journal article supplement (doi:10.1039/d4ma00209a), 2024-01-01
Supplement: d4ma00209a1.pdf [file d4ma00209a1.pdf]

### Supporting Information

**Title: The human brain-inspired light-stimulated gelatin-biopolymer gated synaptic transistor for realizing cognitive activities.**

**Bishwajit Mandal<sup>a</sup>, M. Raveendra Kiran<sup>a,b</sup> and Samarendra Pratap Singh<sup>a\*</sup>**

*<sup>a</sup>Department of Physics, Shiv Nadar Institutions of Eminence, Gautam Buddha Nagar, UP-201314, India*

*<sup>b</sup>Department of Physics & Innovation and Translational Research Hub (iTRH), Presidency University, Bangalore 560064, Karnataka, India*

To whom correspondence should be addressed. Email: [samarendra.singh@snu.edu.in](mailto:samarendra.singh@snu.edu.in)

## **Table of Contents for Supporting Information**

|                                                                                            |    |
|--------------------------------------------------------------------------------------------|----|
| 1. Bi-exponential fitting of PPF decay and relaxation time from the fitting data           | S3 |
| 2. The variation of synaptic weight and EPSC under optical pulse duration and pulse number | S4 |
| 3. The variation of synaptic weight and EPSC under optical pulse intensity                 | S5 |
| 4. Energy consumption of the OFETs per optical spike                                       | S5 |

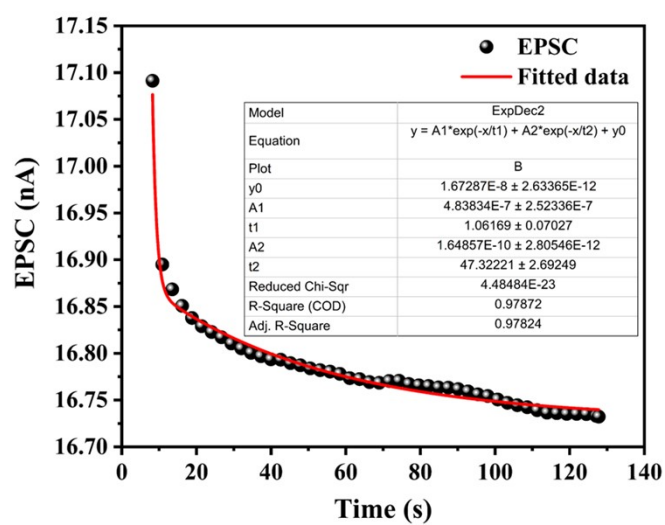

**Figure S1:** Bi-exponential fitting of the PPF graph

**Table S2:** The relaxation time from the bi-exponential fitting

| Fast phase of relaxation | Slow phase of relaxation |
|--------------------------|--------------------------|
| 1.06 s                   | 47.32 s                  |

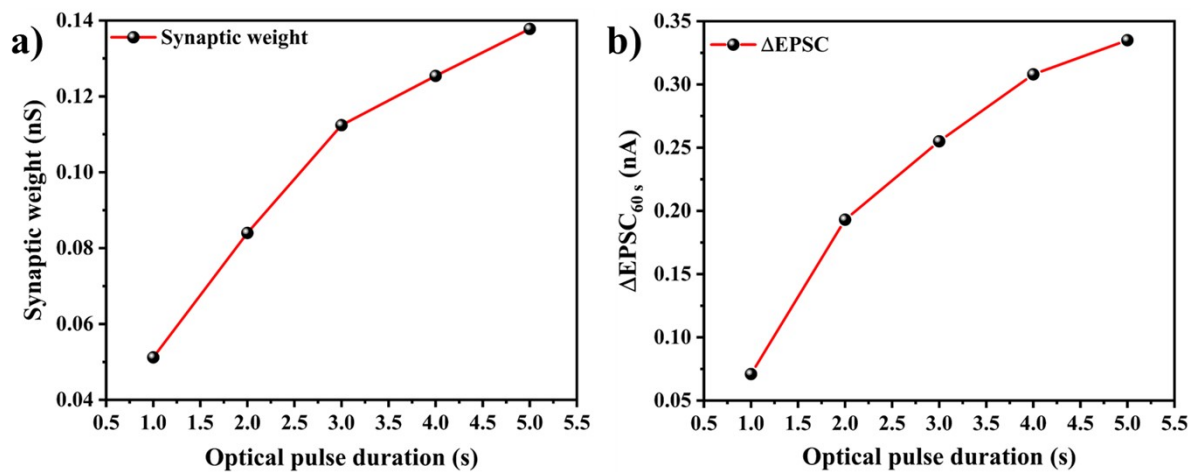

**Figure 2S:** a) Synaptic weight change of the OFET with respect to the optical pulse duration, b) Photo memory retention change of the EPSC after 60 s with respect to the optical pulse duration.

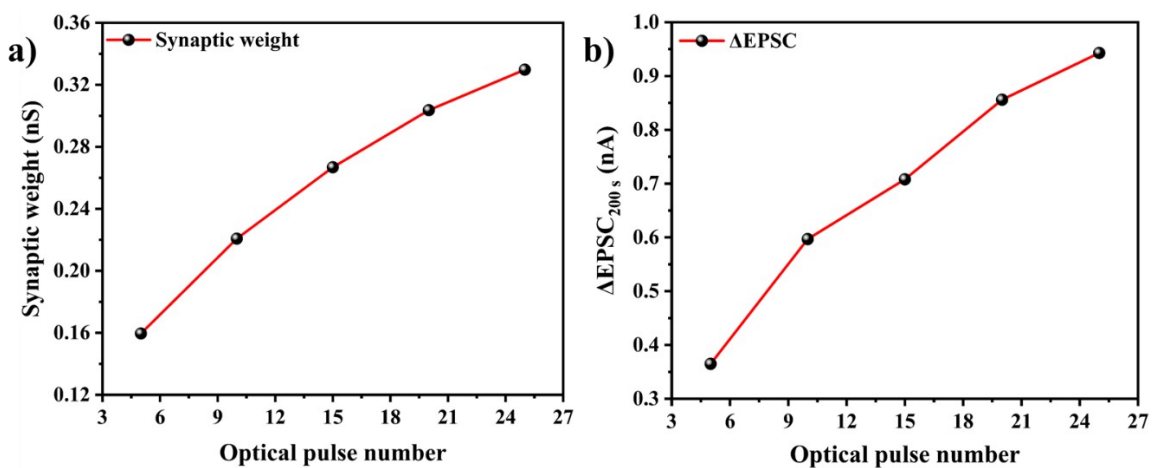

**Figure 3S:** a) Synaptic weight change of the OFET with respect to the optical pulse number b) Photo memory retention change of the EPSC after 200 s with respect to the optical pulse number

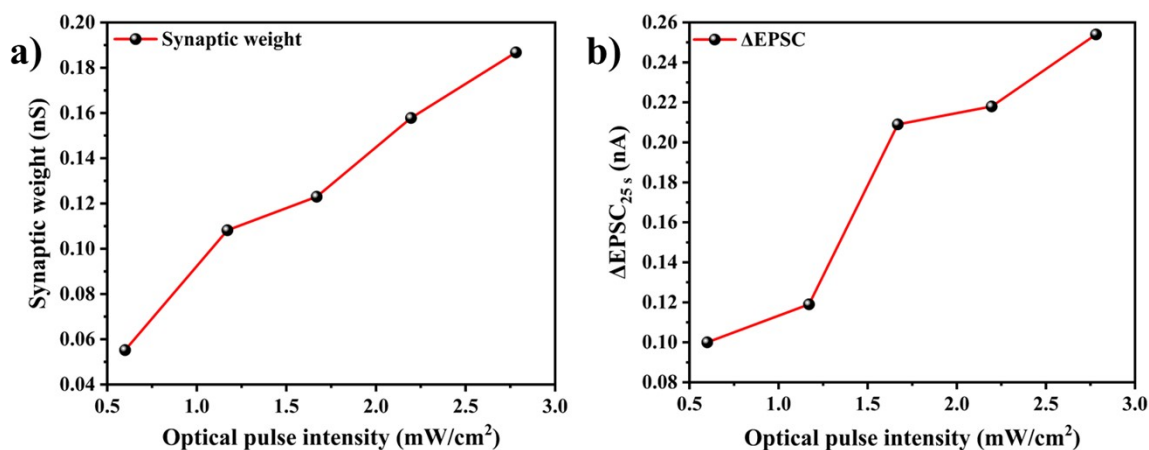

**Figure 4S:** a) Synaptic weight change of the OFET with respect to the optical pulse intensity

b) Photo memory retention change of the EPSC after 25 s with respect to the optical pulse intensity

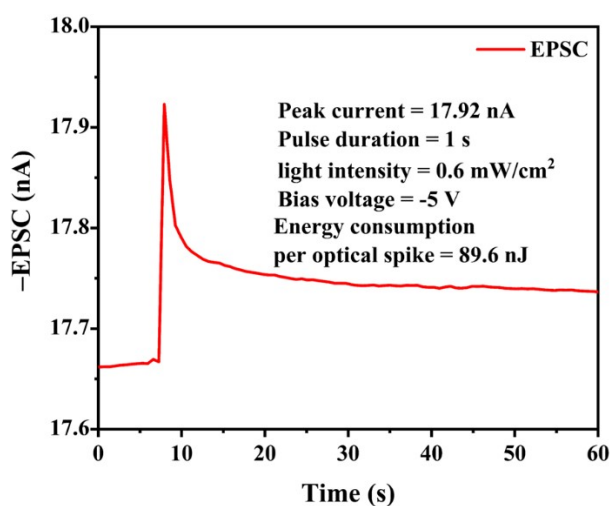

**Figure S5:** Energy consumption of the gelatin-gated PBTTT-C-14-based OFETs per optical pulse (1 s)
